# Supplementary material for: Two-dimensional iron-phthalocyanine (Fe-Pc) monolayer as a promising single-atom-catalyst for oxygen reduction reaction: a computational study
Source: Royal Society of Chemistry journal article supplement (doi:10.1039/c5nr00302d), 2015-01-01
Supplement: c5nr00302d1.pdf [file c5nr00302d1.pdf]

## Electronic Supplementary Information

### **Two-Dimensional Iron-Phthalocyanine (Fe-Pc) Monolayer As a Promising Single-Atom-Catalyst for Oxygen Reduction Reaction: A Computational Study**

Yu Wang,<sup>†</sup> Hao Yuan,<sup>†</sup> Yafei Li,<sup>†,\*</sup> Zhongfang Chen<sup>‡,\*</sup>

College of Chemistry and Materials Science, Jiangsu Key Laboratory of Biofunctional Materials, Nanjing Normal University, Nanjing, Jiangsu, 210023, China, and Department of Chemistry, Institute for Functional Nanomaterials, University of Puerto Rico, Rio Piedras Campus, San Juan, PR 00931.

\* To whom correspondence should be addressed. Email: [liyafei.abc@gmail.com](mailto:liyafei.abc@gmail.com) (YL)  
and [zhongfangchen@gmail.com](mailto:zhongfangchen@gmail.com) (ZC)

**Table S1.** Adsorption energies of O<sub>2</sub> molecule on TM-Pc monolayers (TM = Fe, Mn, Ni, Cu).

|                      | Fe-Pc | Mn-Pc | Ni-Pc | Cu-Pc |
|----------------------|-------|-------|-------|-------|
| E <sub>ad</sub> (eV) | −0.83 | −0.71 | 0.54  | 0.67  |

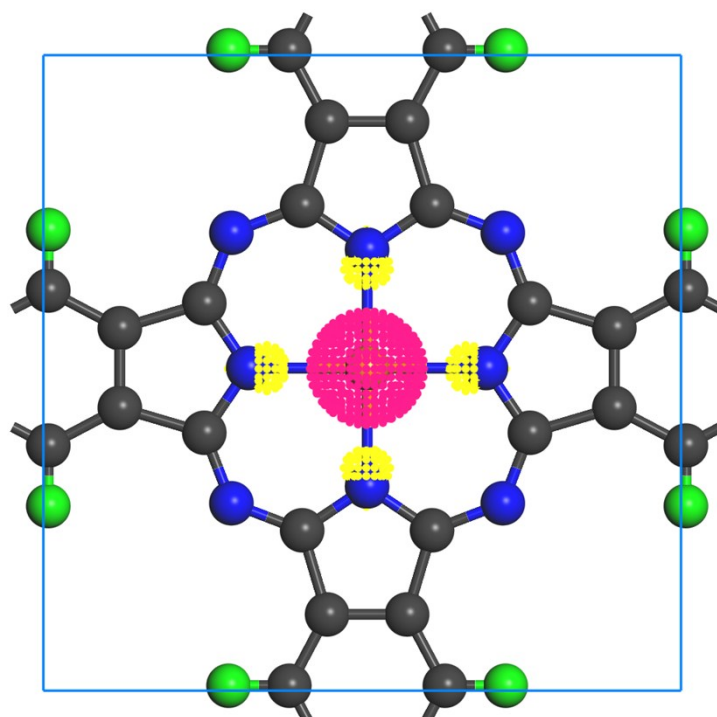

**Fig. S1** Spin-polarized density for Fe-Pc monolayer in the 3D isosurface version with a value of 0.01 electrons Å<sup>-3</sup>. The spin up and spin down are represented in red and yellow, respectively.

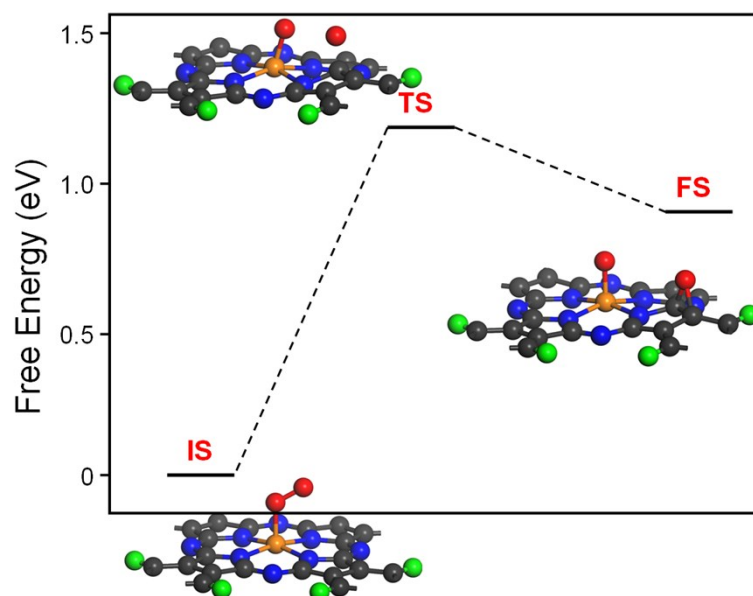

**Fig. S2** Free energy profile for the  $O_2$  dissociation reaction on the surface of Fe-Pc monolayer. The IS, TS, and FS represents initial state, transition state, and final state, respectively.

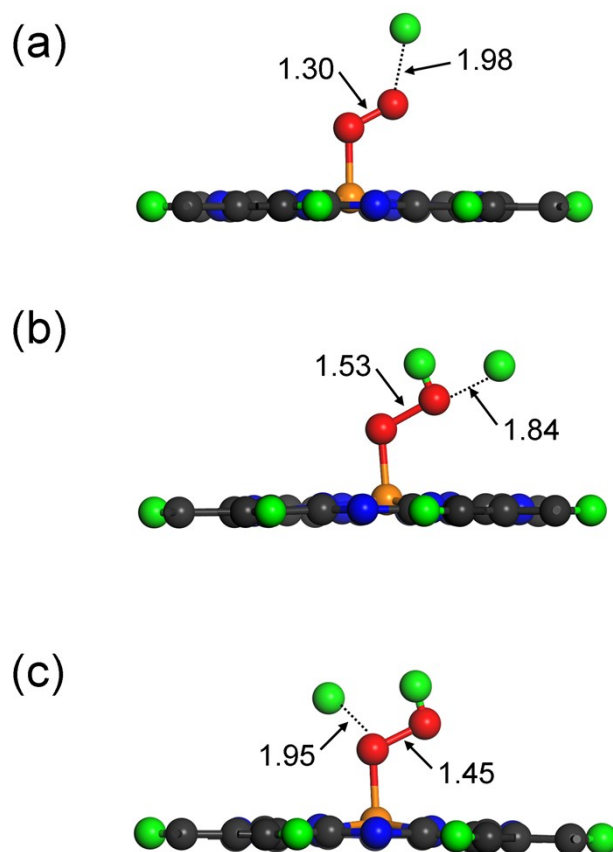

**Fig. S3** The transition state structures of ORR step of (a)  $\text{O}_2^* + \text{H}^+ + \text{e}^- \rightarrow \text{OOH}^*$ , (b)  $\text{OOH}^* + \text{H}^+ + \text{e}^- \rightarrow \text{O}^* + \text{H}_2\text{O}$ , and (c)  $\text{OOH}^* + \text{H}^+ + \text{e}^- \rightarrow ^* + \text{H}_2\text{O}_2$ . The labeled distances are in angstroms.

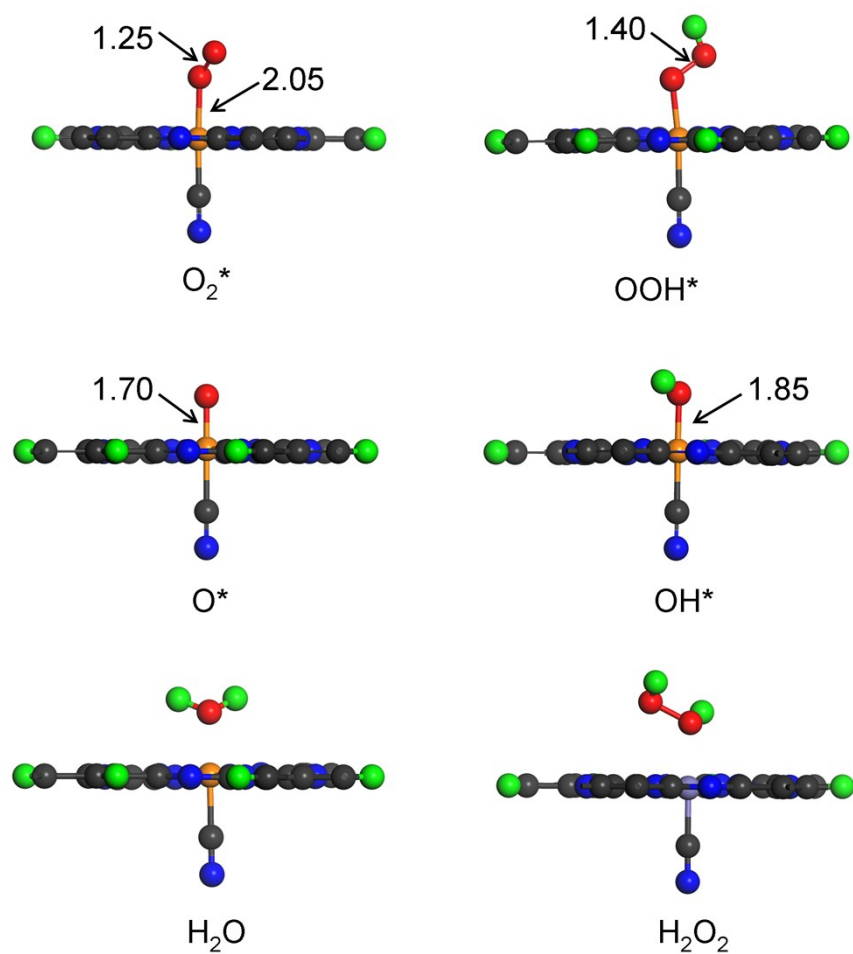

**Fig. S4** The optimized geometric structures of various states ( $\text{O}_2^*$ ,  $\text{OOH}^*$ ,  $\text{O}^*$ ,  $\text{OH}^*$ ,  $\text{H}_2\text{O}$ , and  $\text{H}_2\text{O}_2$ ) along the reaction path of ORR proceeded on Fe-Pc-CN monolayer.

The labeled distances are in angstroms.

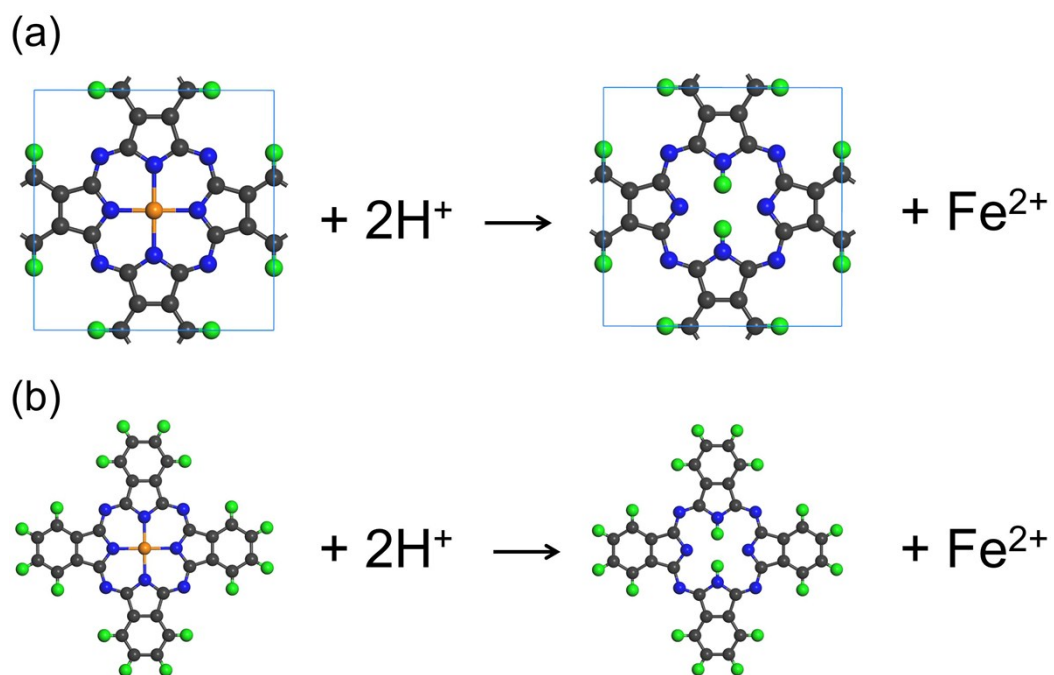

**Fig. S5** Schematic diagrams of Fe/H substitution reaction for (a) Fe-Pc monolayer and (b) Fe-Pc molecule, respectively.

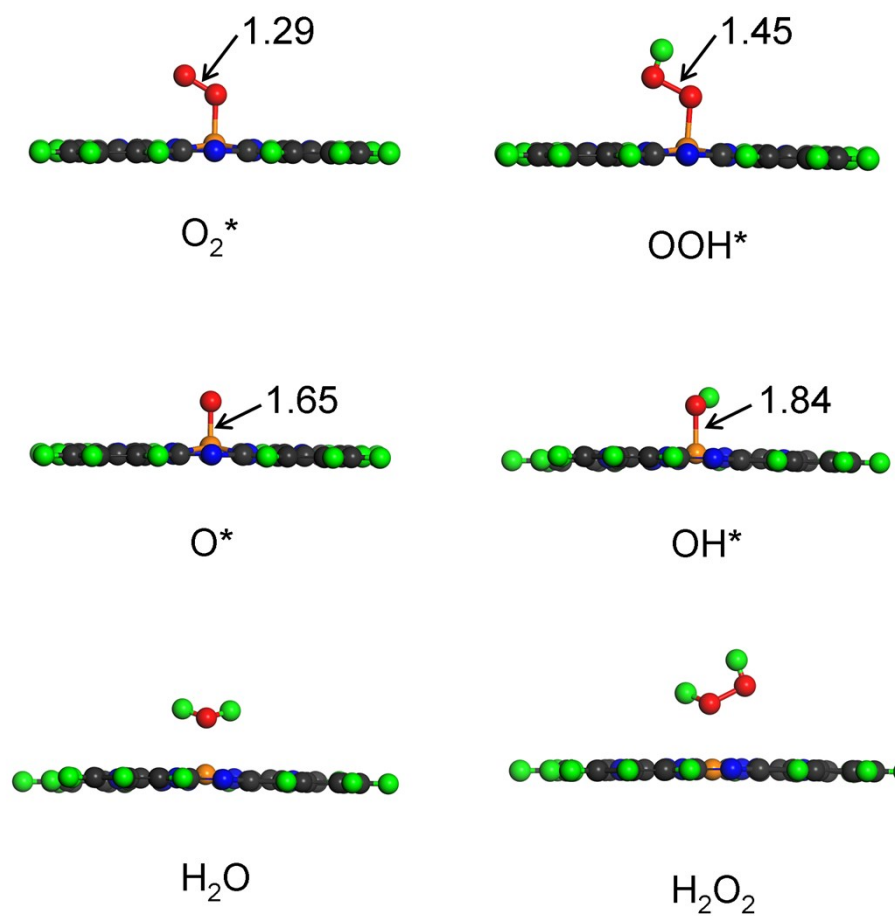

**Fig. S6** The optimized geometric structures of various states ( $O_2^*$ ,  $OOH^*$ ,  $O^*$ ,  $OH^*$ ,  $H_2O$ , and  $H_2O_2$ ) along the reaction path of ORR proceeded on Fe-Pc molecule. The labeled distances are in angstroms.

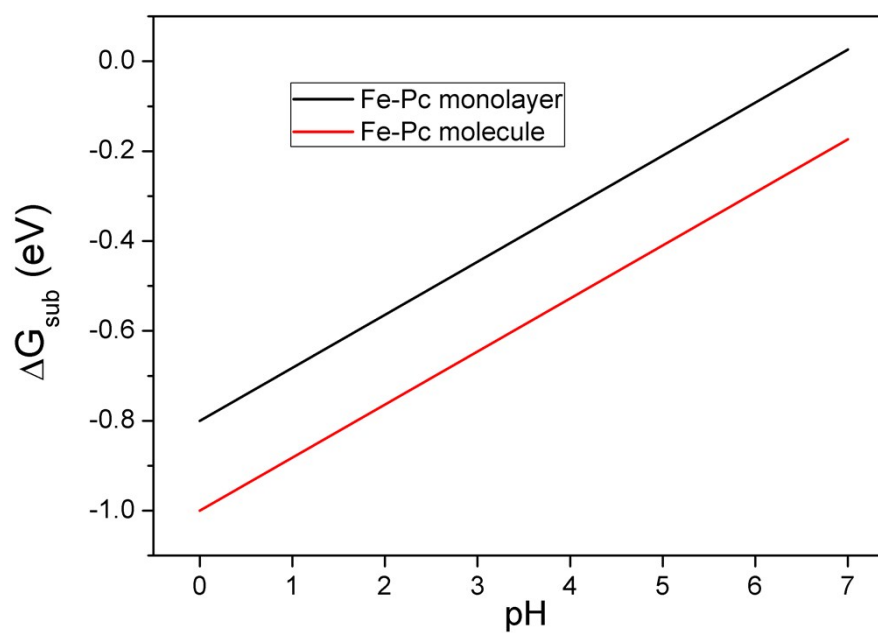

**Fig. S7** The free energy change caused by substituting one Fe atom with two protons ( $\Delta G_{\text{sub}}$ ) in both Fe-Pc monolayer and molecule as a functional of pH.
